# Supplementary material for: Comparison of SP142 and 22C3 PD-L1 assays in a population-based cohort of triple-negative breast cancer patients in the context of their clinically established scoring algorithms
Source: Springer Nature journal article supplement (doi:10.1186/s13058-023-01724-2), 2023-10-10
Supplement: MOESM6 [file 26148066]

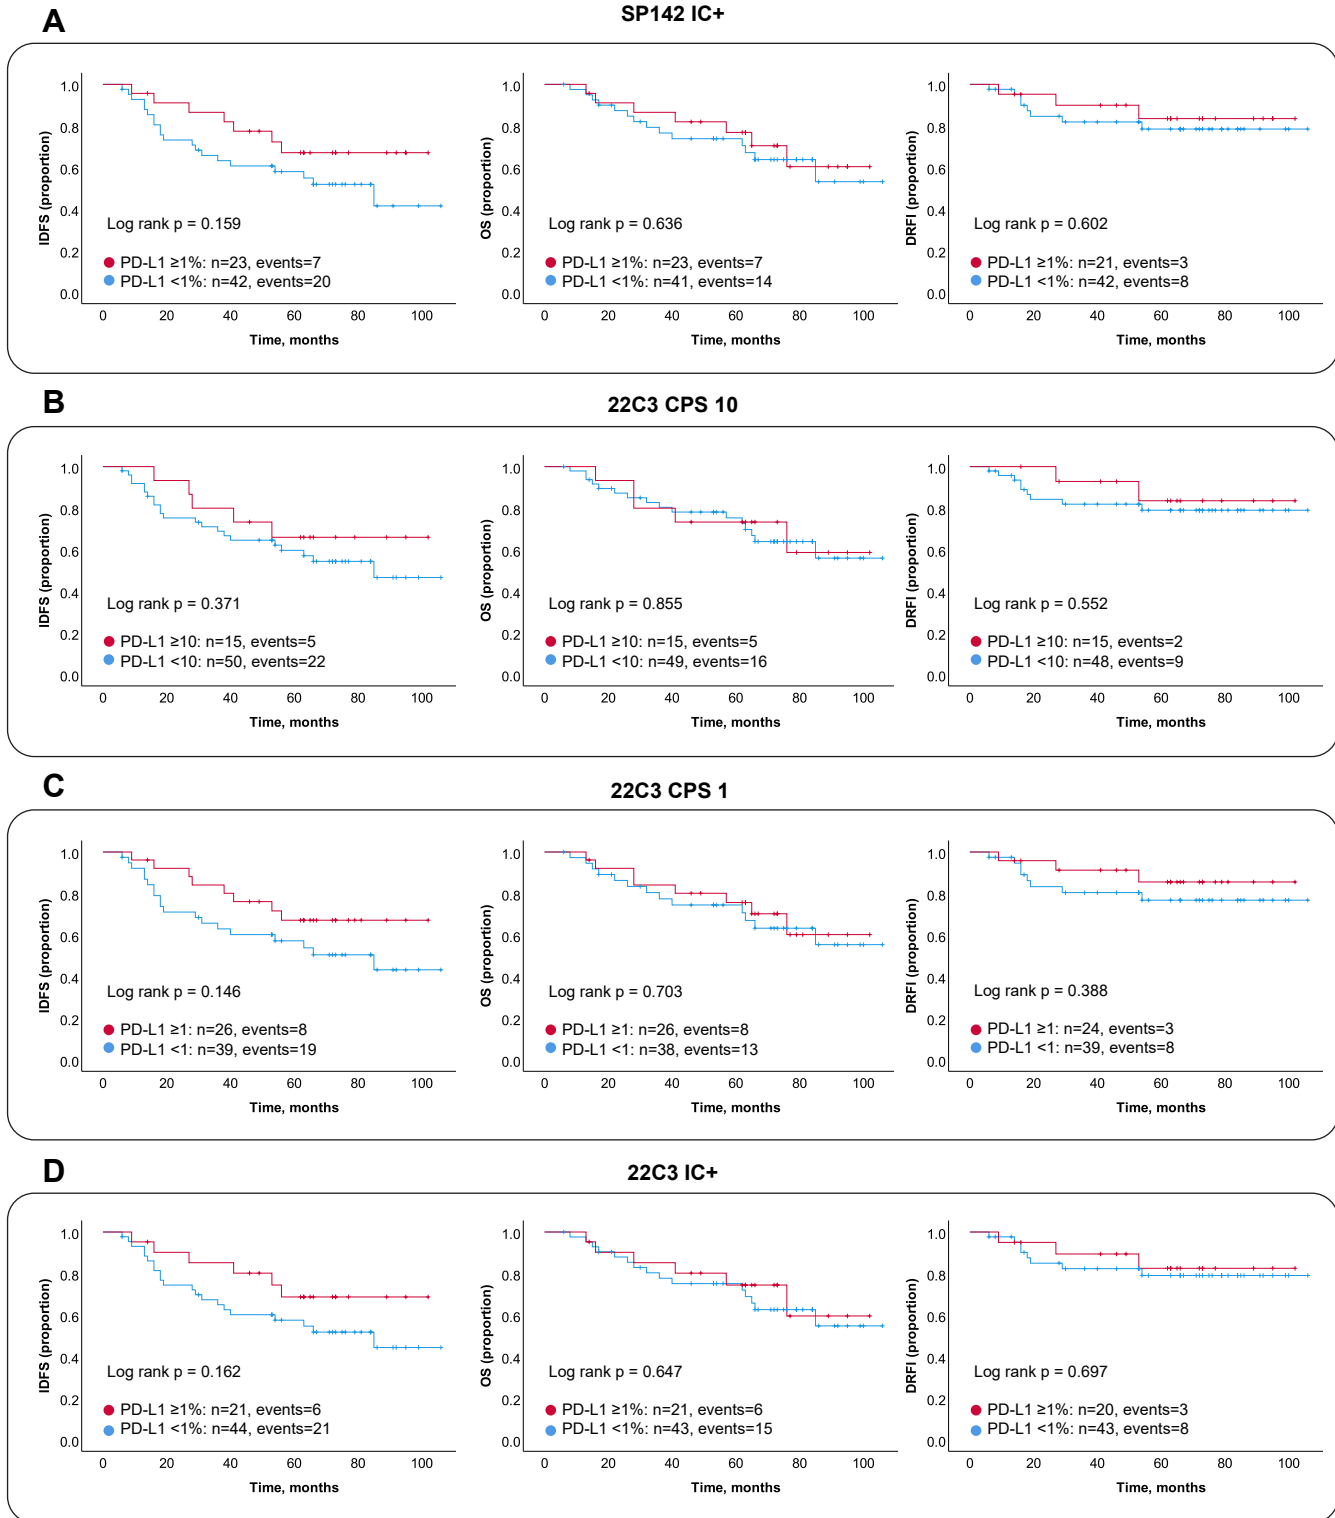

**Fig. S2 Kaplan Meier survival analyses in the cohort not receiving (neo)adjuvant chemotherapy.** Invasive disease-free survival (IDFS), overall survival (OS) and distant relapse-free interval (DRFI) according to PD-L1 SP142 immune cell staining (IC+) in panel (A), in panel (B) for 22C3 combined positive score (CPS) at a threshold of 10, in (C) according to 22C3 CPS at a threshold of 1 and in (D) for 22C3 IC+.
